# Supplementary material for: Title Page: Oncologist-Led, Survivorship-Focused Primary Care: Feasibility and Outcomes of a Novel Integrated Care Model
Source: Research Square preprint supplement (doi:10.21203/rs.3.rs-8503510/v1), 2026-02-20
Supplement: Supplementary file 1 [file e04ed50bfd6b0223f52e4749.xlsx]

## Sheet: Sheet1
Age	Gender	Cancer Type	Referral Source	REFERRAL	Active Disease (Y/N)	Genetic Mutation (Y/N)	Mutation Type	AYA (Y/N)	Fertility Addressed	Fertility Referral	Sexual Health Addressed	Bone health addressed	Bone referral	CV risk addressed	CV med started/adjusted (e.g. statin, antihypertensive, DM2 med)	CV referral	Mental health addressed	Cancer related fatigue	Cognitive function addressed	Cognitive referral placed	Mental health referral	Sec. Ca screening	Sec. Ca Diagnosed	Surveillance addressed	Recurrence diagnosed	EOL/GOC	Vaccines	Additional Problems addressed	Symptom management addressed (e.g. neuropathic pain, insomnia)	BMT?	Alive/Deceased	Exercise	Nutrition	Month/year started	Total visits - Nov 1 2023	Televisit	F2F
23	F	Hodgkins	HAT	HAT	N	N		Y	Y	N	Y	Y	N	Y	N	N	Y	N	N	N	N	Y	N	Y	N	N	Y	Y	N	N	A	Y	Y	2021-12-09	2	0	2
23	F	sarcoma	pediatric oncology	oncology	N	N		Y	Y	Y	N	N	N	Y	N	N	Y	N	N	N	N	Y	N	Y	N	N	Y	Y	Y	N	A	Y	Y	2022-03-21	1	0	1
25	F	Hodgkins lymphoma	self	Self	N	N		Y	Y	N	N	Y	N	Y	N	N	Y	N	N	N	Y	Y	N	Y	N	N	Y	Y	N	N	A	N	N	2022-10-21	2	0	2
26	F	Hodgkin lymphoma	HAT	HAT	N	N		Y	Y	Y	N	N	N	Y	N	N	Y	Y	Y	N	N	Y	N	Y	N	N	Y	Y	Y	N	A	Y	N	2022-12-23	1	0	1
27	F	ALL	HAT	HAT	N	N		Y	Y	Y	N	Y	N	Y	N	N	Y	N	N	N	N	Y	N	Y	N	N	Y	Y	Y	Y	A	N	N	2022-03-14	2	1	1
27	F	AML	HAT	HAT	N	N		Y	N	N	N	N	N	Y	N	N	Y	N	N	N	N	Y	N	Y	N	N	Y	Y	Y	Y	A	N	N	2022-10-01	1	0	1
28	F	AML	dermatology		N	N		Y	Y	Y	N	Y	N	Y	N	N	Y	N	N	N	N	Y	N	Y	N	N	Y	Y	Y	Y	A	N	Y	2022-04-08	1	0	1
30	F	Hodgkin lymphoma	HAT	HAT	N	N		Y	Y	Y	N	N	N	Y	N	N	Y	N	Y	N	N	Y	N	Y	N	N	Y	Y	Y	N	A	Y	N	2022-02-08	1	0	1
31	F	Fanconi anemia	primary care	primary care	N	N		Y	N	N	N	Y	N	Y	N	N	N	N	N	N	N	Y	N	N	N	N	Y	Y	Y	Y	A	Y	Y	2022-05-01	3	2	1
31	F	neuroblastoma	HAT	HAT	N	N		Y	Y	N	N	Y	N	Y	N	N	Y	N	N	N	N	Y	N	Y	N	N	Y	Y	Y	Y	A	Y	Y	2022-04-01	2	1	1
32	F	breast	Oncology	oncology	Y	Y	BRCA1	Y	Y	N	N	N	N	N	N	N	Y	N	N	N	N	Y	N	Y	N	N	Y	Y	Y	N	D	Y	Y	2022-06-03	1	0	1
32	F	Hodgkins	lymphoma clinic	oncology	Y	N		Y	Y	Y	N	N	N	Y	N	N	Y	N	N	N	N	Y	N	Y	active	N	y	y	N	N	alive	Y	Y	2023-04-01	3	0	3
32	F	MDS	BMT	BMT	N	Y	GATA2	Y	N	N	N	Y	N	Y	N	N	Y	N	N	N	N	Y	N	Y	N	N	Y	Y	Y	Y	A	N	N	2023-01-01	2	0	2
33	F	Basal cell carcinoma	Medical oncology	oncology	N	Y	BAP1	Y	N	N	N	N	N	N	N	N	N	N	N	N	N	Y	N	Y	N	N	Y	Y	N	N	A	N	N	2022-04-01	1	0	1
33	F	Breast	Self	Self	N	N		Y	Y	N	Y	Y	N	N	N	N	N	N	N	N	N	Y	N	Y	N	N	Y	Y	Y	N	A	Y	Y	2021-11-23	8	1	7
35	F	Breast	Self	Self	N	Y	BRCA2	Y	Y	Y	Y	N	N	N	N	N	Y	N	N	N	N	Y	N	Y	N	N	Y	Y	Y	N	A	N	N	2022-06-06	2	0	2
35	F	DLBCL	HAT	HAT	N	N		Y	Y	N	N	Y	N	Y	N	N	Y	N	N	N	N	Y	N	Y	N	N	Y	Y	Y	N	A	N	N	2021-11-30	3	0	3
35	F	Melanoma	Genetic counselor	Genetics	N	Y	BAP1	Y	N	N	N	N	N	N	N	N	Y	N	N	N	Y	Y	N	Y	N	N	Y	Y	Y	N	A	N	N	2021-12-01	15	6	9
36	F	ALL	Self	Self	N	N		Y	Y	Y	Y	Y	N	Y	N	N	Y	N	N	N	N	Y	N	N	N	N	Y	Y	N	N	A	N	Y	2022-04-15	2	1	1
36	F	breast	oncology	oncology	Y	N		Y	Y	Y	N	N	N	Y	N	N	Y	N	N	N	N	Y	N	Y	Y	N	Y	Y	Y	N	A	Y	Y	2022-02-01	1	1	0
37	F	aplastic anemia	BMT	BMT	N	N		Y	Y	Y	Y	Y	N	Y	N	N	Y	N	N	N	N	Y	N	Y	N	N	Y	Y	Y	Y	A	N	N	2022-03-04	3	0	3
38	F	breast cancer	oncology	oncology	N	Y	BRCA1	Y	Y	N	N	N	N	Y	N	N	Y	N	Y	Y	N	Y	N	Y	N	N	Y	Y	Y	N	A	Y	Y	2023-01-27	4	1	3
38	F	Hodgkin lymphoma	oncology	oncology	N	N		Y	Y	N	N	N	N	Y	N	N	Y	N	N	N	N	Y	N	Y	N	N	Y	Y	Y	N	A	Y	N	2022-12-09	2	0	2
38	F	PMBCL	Medical oncology	oncology	N	N		Y	Y	Y	N	N	N	Y	N	N	Y	Y	Y	N	Y	Y	N	Y	N	N	Y	Y	Y	N	A	Y	N	2022-03-22	3	2	1
38	F	thymoma	oncology	oncology	N	N		Y	Y	Y	N	N	N	Y	N	N	Y	N	N	N	Y	Y	N	Y	N	N	Y	Y	Y	N	A	Y	Y	2022-06-17	2	0	2
39	F	breast	oncology	oncology	N	N		Y	Y	N	N	N	N	Y	N	N	Y	N	N	N	N	Y	N	Y	N	N	Y	Y	Y	N	A	Y	Y	2022-02-28	1	0	1
39	F	breast	primary care	primary care	N	N		Y	Y	N	Y	Y	N	Y	N	N	Y	N	N	N	N	Y	N	Y	N	N	Y	Y	Y	N	A	Y	N	2022-03-04	2	0	2
39	F	melanoma	Self	Self	N	N		Y	N	N	N	N	N	Y	N	N	N	N	N	N	N	Y	N	Y	N	N	Y	Y	N	N	A	N	N	2022-07-01	2	0	2
40	F	breast	Medical oncology	oncology	N	N		Y	Y	N	Y	Y	N	Y	N	N	Y	N	N	N	N	Y	Y	Y	N	N	Y	Y	Y	N	A	Y	Y	2022-03-24	2	0	2
40	F	breast, giant cell tumor	genetics	Genetics	N	Y	TP53	Y	N	N	N	N	N	Y	N	N	Y	Y	N	N	N	Y	N	Y	N	N	Y	Y	Y	N	A	N	N	2022-02-01	1	1	0
41	F	breast	oncology	oncology	N	Y	BRCA1	N	Y	N	N	N	N	Y	N	N	Y	N	N	N	N	Y	N	Y	N	N	Y	N	Y	N	A	Y	N	2022-09-23	1	0	1
42	F	Breast	Medical oncology	oncology	N	N		N	N	N	N	N	N	Y	N	N	Y	N	N	N	N	Y	N	Y	N	N	Y	Y	Y	N	A	N	Y	2022-07-01	2	1	1
43	F	Osteosarcoma, breast, hepatic	Medical oncology	oncology	Y	Y	TP53	N	N	N	N	N	N	Y	N	N	Y	N	N	N	N	Y	N	Y	N	N	Y	Y	Y	N	A	N	N	2022-11-18	5	1	4
45	F	breast	Genetics	Genetics	Y	Y	BAP1	N	N	N	N	N	N	Y	N	N	N	N	N	N	N	Y	N	active	active	N	Y	Y	N	N	A	N	N	2022-04-01	1	0	1
45	F	breast	oncology	oncology	N	Y	ATM	N	N	N	N	Y	N	Y	N	N	Y	N	N	N	Y	Y	N	Y	N	N	Y	Y	Y	N	A	Y	Y	2022-06-01	2	0	2
45	F	Hairy cell leukemia	Self	Self	N	N		N	N	N	Y	Y	N	Y	N	N	N	N	N	N	N	Y	N	Y	N	N	Y	Y	Y	N	A	Y	Y	2022-01-21	6	2	4
46	F	breast	Medical oncology	oncology	N	N		N	N	N	Y	Y	N	Y	N	N	N	Y	N	N	N	Y	N	Y	N	N	Y	Y	Y	N	A	Y	Y	2022-05-20	5	1	4
46	F	Breast	Medical oncology	oncology	N	N		N	N	N	N	Y	N	Y	N	N	Y	N	N	N	N	Y	N	Y	N	N	Y	Y	Y	N	A	Y	Y	2022-06-24	1	0	1
46	F	Colon	Self	Self	N	n		n	N	N	N	Y	N	Y	N	N	Y	N	Y	Y	N	Y	N	Y	N	N	Y	Y	Y	N	alive	Y	Y	2023-03-01	1	0	1
46	F	pilocytic astrocytoma	primary care	primary care	N	N		N	N	N	N	N	N	Y	N	N	Y	N	N	N	N	Y	N	Y	N	N	Y	Y	Y	N	A	Y	Y	2022-09-01	1	0	1
47	F	AML	hematology	hematology	N	N		N	N	N	N	N	N	Y	N	N	N	N	N	N	N	Y	N	Y	N	N	Y	Y	Y	Y	A	Y	Y	2021-01-01	2	1	1
47	F	DLBCL	Medical oncology	oncology	N	N		N	N	N	N	N	N	Y	N	N	Y	Y	Y	Y	N	Y	N	Y	N	N	Y	Y	Y	N	A	Y	Y	2022-08-01	6	4	2
48	F	breast	oncology	oncology	N	N		N	N	N	Y	Y	N	Y	N	N	Y	Y	N	N	N	Y	N	Y	N	N	Y	Y	Y	N	A	Y	Y	2022-02-18	3	1	2
48	F	breast	gyn onc	Oncology	N	Y	BRIP1	N	N	N	N	Y	N	Y	N	N	Y	N	N	N	N	N	N	Y	N	N	Y	Y	Y	N	A	Y	Y	2023-03-01	2	0	2
48	F	rectal	long Covid		N	N		N	N	N	N	N	N	N	N	N	Y	Y	Y	Y	Y	Y	N	Y	N	N	Y	Y	Y	N	A	Y	Y	2022-11-01	4	2	2
49	F	AML, Mastocytosis	Hematology	hematology	N	N		N	N	N	N	Y	N	Y	N	N	N	N	N	N	N	Y	N	Y	N	N	Y	Y	Y	Y	A	Y	N	2022-07-01	6	0	6
49	F	breast	oncology	oncology	N	N		N	N	N	Y	N	N	Y	N	N	Y	N	N	N	N	Y	N	Y	N	N	Y	Y	Y	N	A	N	N	2022-09-23	1	0	1
49	F	breast	self	Self	N	Y	BRCA2	N	N	N	Y	Y	N	Y	N	N	Y	N	N	N	N	Y	N	Y	N	N	Y	Y	Y	N	A	N	Y	2021-05-13	7	1	6
49	F	ovarian	gyn onc	Oncology	Y	N		N	N	N	N	N	N	Y	N	N	Y	N	N	N	N	Y	N	active	active	N	Y	Y	Y	N	A	Y	Y	2022-05-01	1	0	1
49	F	rectal adenocarcinoma	primary care	primary care	N	N		N	N	N	N	N	N	Y	N	N	Y	Y	Y	Y	Y	Y	N	Y	N	N	Y	Y	Y	N	A	Y	Y	2022-11-01	4	2	2
50	F	Breast	Medical oncology	oncology	N	N		N	N	N	N	Y	N	Y	N	N	Y	N	N	N	Y	Y	N	N	N	N	Y	Y	N	N	A	Y	Y	2022-10-01	4	0	4
50	F	breast	Self	Self	Y	N		N	N	N	N	Y	N	Y	N	Y	Y	N	Y	N	Y	Y	N	Y	N	N	Y	Y	Y	N	A	Y	Y	2023-02-01	5	2	3
50	F	lung	oncology	oncology	N	N		N	N	N	N	N	N	N	N	N	N	N	N	N	N	Y	N	N	N	N	N	N	N	N	A	N	N	2022-10-01	1	0	1
51	F	breast	oncology	oncology	N	N		N	N	N	N	Y	Y	Y	N	N	Y	N	N	N	N	Y	N	Y	N	N	Y	Y	Y	N	A	N	N	2022-05-01	1	0	1	*Chang now listed as PCP
51	F	breast	self	Self	N	N		N	N	N	Y	Y	N	Y	N	N	Y	N	N	N	N	Y	N	Y	N	N	Y	N	Y	N	A	Y	Y	2022-01-26	3	2	1
51	F	Breast	Self	Self	N	N		N	N	N	N	Y	N	Y	N	N	N	N	N	N	N	Y	N	Y	N	N	Y	Y	N	N	A	Y	Y	2022-01-01	3	0	3
51	F	CLL	BMT	BMT	N	N		N	N	N	N	Y	N	Y	N	N	Y	N	N	N	N	Y	N	Y	N	N	Y	Y	Y	Y	A	Y	Y	2022-12-01	2	1	1
51	F	sarcoma, B cell lymphoma, breast cancer	genetics	Genetics	Y	Y	TP53	N	N	N	N	N	N	Y	N	N	Y	Y	Y	N	N	Y	N	Y	Y	Y	Y	Y	Y	N	A	N	N	2022-01-11	3	2	1
52	F	AML, breast	Medical oncology	oncology	Y	N		N	N	N	Y	Y	N	Y	N	N	Y	N	N	N	N	Y	Y	Y	N	N	Y	Y	Y	Y	A	Y	N	2023-05-19	3	1	2
52	F	breast	genetics	Genetics	N	Y	BRCA1	N	Y	N	Y	Y	N	Y	N	N	Y	N	N	N	N	Y	N	Y	N	N	Y	Y	Y	N	A	Y	N	2021-11-16	3	1	2
52	F	breast	oncology	oncology	N	N		N	N	N	Y	Y	Y	Y	N	N	Y	N	N	N	N	Y	N	Y	N	N	Y	Y	Y	N	A	N	N	2022-06-24	2	1	1
52	F	breast	oncology	oncology	N	N		N	N	N	Y	Y	N	Y	Y	Y	Y	N	N	N	N	Y	N	Y	N	N	Y	Y	Y	N	A	Y	Y	2022-07-29	1	0	1
52	F	breast	self	Self	N	N		N	Y	N	Y	N	N	Y	N	N	Y	N	N	N	N	Y	N	Y	N	N	Y	Y	Y	N	A	Y	Y	2022-08-30	4	1	3
52	F	breast	Medical oncology	oncology	N	N		N	N	N	N	Y	N	Y	Y	N	Y	Y	N	N	Y	Y	N	Y	N	N	Y	Y	Y	N	A	Y	Y	2022-03-14	15	7	5
53	F	AML, Colon	Medical oncology	oncology	N	N		N	N	N	N	Y	N	Y	N	Y	N	N	N	N	N	Y	N	Y	N	N	Y	Y	Y	Y	A	N	N	2022-01-01	2	1	1
53	F	Breast	Medical oncology	oncology	N	N		N	N	N	Y	Y	N	Y	N	N	N	N	Y	N	N	Y	N	Y	N	N	Y	Y	Y	N	A	N	N	2023-01-27	1	0	1
53	F	breast	oncology	oncology	Y	N		N	Y	N	N	Y	N	Y	N	N	Y	N	N	N	N	Y	N	Y	N	N	Y	Y	Y	N	A	N	N	2022-06-03	1	0	1
53	F	Breast	Self	Self	N	N		N	N	N	N	Y	N	Y	N	N	N	N	N	N	N	Y	N	Y	N	N	Y	Y	Y	N	A	Y	Y	2021-12-01	3	1	2
53	F	Ovarian	primary care	primary care	Y	N		N	N	N	N	Y	N	N	N	N	N	N	N	N	N	Y	N	active	active	N	Y	Y	Y	N	A	Y	Y	2022-03-01	2	1	1
54	F	Breast	Self	Self	N	N		N	N	N	Y	Y	N	Y	N	N	Y	N	N	N	N	Y	N	Y	N	N	Y	Y	Y	N	A	Y	Y	2022-01-03	3	1	2
55	F	breast	self	Self	N	N		N	N	N	Y	Y	N	Y	N	N	Y	N	N	N	N	Y	N	Y	N	N	Y	Y	Y	N	A	Y	Y	2021-12-10	4	3	1
55	F	Colon, breast	Emergency Dept		Y	N		N	N	N	N	Y	N	Y	N	N	Y	N	N	N	Y	Y	N	Y	N	N	Y	Y	Y	N	A	Y	N	2021-11-30	3	3	0
55	F	Thyroid	Medical oncology	oncology	N	Y	POT1	N	N	N	N	Y	N	Y	N	Y	Y	N	N	N	N	Y	N	Y	N	N	Y	Y	Y	N	A	Y	N	2021-11-01	4	1	3
56	F	AML	Medical oncology	oncology	N	N		N	N	N	N	Y	N	Y	N	N	Y	N	N	N	N	Y	N	Y	N	N	Y	Y	Y	Y	A	N	N	2023-01-01	1	0	1
56	F	breast	oncology	oncology	N	N		N	N	N	N	Y	N	Y	N	N	N	N	N	N	N	Y	N	Y	N	N	N	Y	Y	N	A	N	N	2022-12-01	2	0	2
56	F	breast	self	Self	Y	N		N	N	N	Y	Y	N	Y	N	N	Y	N	N	N	N	Y	N	Y	active	N	Y	Y	Y	N	A	Y	Y	2022-08-01	2	0	2
56	F	pancreas, ovarian	oncology	oncology	N	Y	Lynch	N	N	N	N	Y	N	Y	N	N	Y	N	N	N	N	Y	N	Y	N	N	Y	Y	Y	N	A	Y	Y	2021-11-01	2	0	2
57	F	Breast	Medical oncology	oncology	N	N		N	N	N	Y	Y	N	Y	N	N	N	N	N	N	N	Y	N	Y	N	N	Y	Y	Y	N	A	N	N	2021-12-03	4	0	4
57	F	DLBCL	oncology	oncology	N	N		N	N	N	N	N	N	Y	N	N	Y	N	N	N	Y	Y	N	Y	N	N	Y	Y	Y	N	A	N	N	2022-09-01	1	0	1
57	F	lymphoma	self	Self	N	N		N	N	N	N	Y	N	Y	N	N	Y	N	Y	Y	N	Y	N	N	N	N	Y	Y	Y	Y	A	Y	Y	2022-04-01	5	3	2
58	F	breast	genetics	Genetics	N	Y	TP53	N	N	N	N	N	N	N	N	N	N	N	N	N	N	Y	N	Y	N	N	N	N	N	N	A	N	N	2022-09-01	1	0	1		No longer your PCP patient - consider excluding
58	F	Breast	Medical oncology	oncology	N	N		N	N	N	Y	Y	N	Y	N	N	Y	N	N	N	N	Y	N	Y	N	N	Y	Y	Y	N	A	Y	Y	2022-10-21	2	0	2
58	F	breast	Oncology	oncology	N	N		N	N	N	Y	Y	N	Y	N	N	Y	N	N	N	N	Y	N	Y	N	N	Y	Y	Y	N	A	Y	N	2021-03-25	2	1	1
58	F	breast	self	Self	N	N		N	N	N	Y	Y	N	Y	N	N	Y	N	N	N	N	Y	N	Y	N	N	Y	Y	Y	N	A	N	N	2022-07-09	1	0	1
58	F	Lung	thoracic oncology	oncology	N	N		N	N	N	N	N	N	Y	N	N	Y	N	N	N	N	Y	N	Y	N	N	Y	Y	Y	N	alive	N	N	2023-02-01	1	0	1
59	F	Breast	Internal medicine		N	N		N	N	N	N	Y	N	Y	Y	N	N	N	N	N	N	Y	N	Y	N	N	Y	Y	Y	N	A	N	N	2022-05-01	5	2	3
59	F	breast, multiple myeloma, melanoma	hematology	hematology	Y	N		N	N	N	N	Y	N	Y	N	N	Y	N	N	N	N	Y	N	Y	N	N	Y	Y	Y	N	A	N	N	2022-12-16	2	1	1
59	F	breast, thyroid, lung	Medical oncology	oncology	Y	N		N	N	N	N	N	N	Y	N	N	Y	N	N	N	N	Y	N	Y	Y	N	Y	Y	Y	N	A	Y	N	2022-03-18	6	4	2
60	F	breast	oncology	oncology	N	N		N	N	N	Y	Y	N	Y	N	N	Y	N	N	N	N	Y	N	Y	N	N	Y	Y	Y	N	A	Y	N	2021-11-23	3	1	2
60	F	Breast	Self	Self	N	N		N	N	N	N	N	N	Y	N	N	N	N	N	N	N	Y	N	Y	N	N	Y	Y	Y	N	A	Y	Y	2023-01-01	1	0	1
60	F	breast, melanoma	genetics	Genetics	N	Y	TP53	N	N	N	N	Y	N	Y	N	N	N	N	N	N	N	Y	N	Y	N	N	Y	Y	Y	N	A	Y	N	2022-08-01	2	0	2
61	F	breast	Genetics	Genetics	N	Y	PMS2	N	N	N	N	Y	N	Y	N	N	N	N	N	N	N	Y	N	Y	N	Y	Y	Y	Y	N	A	Y	Y	2022-04-01	3	1	2
61	F	breast	oncology	oncology	N	N		N	N	N	N	Y	N	Y	N	N	Y	N	N	N	N	Y	N	Y	N	N	Y	Y	Y	N	A	Y	Y	2022-03-01	1	0	1	*Narula now listed as PCP
61	F	breast	primary care	primary care	Y	N		N	N	N	N	Y	N	N	N	N	Y	N	N	N	N	Y	N	active	active	N	Y	Y	Y	N	A	N	N	2022-10-01	6	3	3
61	F	breast	self	Self	N	N		N	N	N	Y	Y	N	Y	N	N	Y	N	N	N	N	Y	N	Y	N	Y	Y	Y	Y	N	A	Y	Y	2021-06-24	12	8	4
61	F	Ovarian, breast, melanoma	Self	Self	Y	N		N	N	N	N	N	N	Y	Y	N	Y	Y	N	N	Y	Y	Y	active	active	Y	Y	Y	Y	N	A	N	N	2023-01-24	5	2	3
62	F	Breast	Medical oncology	oncology	N	N		N	N	N	N	Y	N	Y	Y	N	Y	N	N	N	Y	Y	N	Y	N	N	Y	Y	Y	N	A	Y	Y	2021-11-01	6	4	2
62	F	breast	Primary care	primary care	N	N		N	N	N	N	Y	N	Y	N	N	Y	N	N	N	N	Y	N	Y	N	N	Y	Y	Y	N	A	Y	Y	2022-02-02	2	2	0
62	F	breast	self	Self	N	N		N	N	N	N	Y	N	Y	N	N	Y	N	N	N	N	Y	N	Y	N	N	Y	Y	Y	N	A	N	N	2021-11-29	4	1	3
62	F	Breast	Self	Self	N	N		N	N	N	N	Y	N	Y	N	N	N	N	N	N	N	Y	N	Y	N	N	Y	Y	N	N	A	Y	Y	2022-05-01	2	0	2
62	F	Breast	Self	Self	N	N		N	N	N	Y	Y	N	Y	N	Y	Y	N	Y	N	Y	Y	N	Y	N	N	Y	Y	Y	N	A	Y	Y	2022-07-22	7	1	6
62	F	MDS	BMT	BMT	N	N		N	N	N	N	Y	N	Y	N	N	N	N	N	N	N	Y	N	Y	N	N	Y	Y	Y	Y	A	N	N	2022-09-01	3	1	2
63	F	breast	oncology	oncology	N	N		N	N	N	Y	Y	Y	Y	N	N	Y	N	N	N	N	Y	N	Y	N	N	Y	Y	Y	N	A	Y	Y	2022-10-28	3	1	2
63	F	breast	oncology	oncology	N	N		N	N	N	N	Y	N	Y	Y	N	Y	N	Y	Y	Y	Y	N	Y	N	N	N	Y	Y	N	A	N	N	2022-07-01	6	5	1
63	F	Breast	Self	Self	N	N		N	N	N	Y	Y	N	Y	N	N	Y	N	N	N	N	Y	N	Y	N	N	Y	Y	Y	N	A	Y	Y	2022-01-14	3	0	3
63	F	Breast	Self	Self	N	N		N	N	N	N	Y	N	Y	Y	Y	Y	N	N	N	N	Y	N	Y	N	N	Y	Y	Y	N	A	Y	Y	2021-11-19	6	3	3
63	F	Melanoma	Dermatology		N	N		N	N	N	N	Y	N	N	N	N	Y	N	N	N	Y	Y	N	Y	N	N	Y	Y	Y	N	A	N	N	2021-11-16	5	3	2
63	F	Multiple myeloma	Self	Self	N	N		N	N	N	N	Y	Y	Y	N	N	Y	N	N	N	N	Y	N	Y	N	N	Y	Y	Y	N	A	Y	Y	2021-11-09	11	8	3
63	F	Ovarian, Breast	Self	Self	N	N		N	N	N	N	Y	N	Y	N	N	N	N	N	N	N	Y	N	Y	N	N	Y	Y	Y	N	A	N	N	2021-11-01	1	0	1
63	F	uterine serous	primary care	primary care	N	N		N	N	N	N	Y	N	Y	N	N	Y	Y	N	N	N	Y	N	N	N (recurrence 2023, s/p carbo/taxol)	N	Y	Y	N	N	A	Y	N	2022-06-03	3	1	2
64	F	Anal squamous cell	Self	Self	N	N		N	N	N	N	N	N	Y	N	N	Y	N	N	N	N	Y	N	N	N	N	Y	Y	N	N	A	Y	Y	2022-05-01	4	3	1
64	F	Breast	Medical oncology	oncology	Y	N		N	N	N	N	Y	Y	Y	N	N	N	N	Y	N	N	Y	N	Y	active	N	Y	Y	Y	N	A	Y	Y	2022-07-01	2	1	1
64	F	Polycythemia vera	Self	Self	Y	N		N	N	N	N	N	N	Y	N	Y	N	Y	N	N	N	Y	N	active	active	N	Y	Y	Y	N	alive	Y	Y	2023-02-01	4	2	2
65	F	amyloidosis, plasma cell dyscrasia	Hematology	hematology	Y	N		N	N	N	N	Y	N	Y	Y	Y	Y	Y	Y	N	Y	N	N	N	active	N	Y	Y	Y	N	A	Y	N	2022-09-01	5	5	0
65	F	Breast	Medical oncology	oncology	N	N		N	N	N	Y	Y	N	Y	N	N	N	N	N	N	N	Y	N	Y	N	N	Y	Y	Y	N	A	Y	Y	2022-05-20	4	0	4
65	F	breast	oncology	oncology	N	Y	RAD51C	N	N	N	N	Y	Y	Y	N	N	Y	N	N	N	N	Y	N	Y	N	N	Y	Y	Y	N	A	Y	Y	2022-11-01	3	2	1
65	F	DLBCL	Self	Self	N	N		N	N	N	N	Y	N	Y	N	N	N	N	N	N	N	Y	N	Y	N	N	Y	Y	Y	N	A	N	Y	2020-09-01	12	12	0
65	F	lung	oncology	oncology	N	N		N	N	N	N	N	N	Y	N	N	Y	Y	N	N	N	Y	N	Y	N	N	Y	Y	Y	N	A	Y	N	2023-03-01	1	0	1
66	F	Breast	Medical oncology	oncology	Y	N		N	N	N	N	Y	N	Y	N	N	Y	N	N	N	N	N	N	active	active	N	Y	Y	Y	N	A	N	N	2022-01-20	3	1	2
66	F	Breast	Self	Self	N	N		N	N	N	N	Y	N	Y	N	Y	N	N	N	N	Y	Y	N	Y	N	N	Y	Y	Y	N	A	N	Y	2022-09-14	3	2	1
67	F	breast	oncology	oncology	N	N		N	N	N	Y	Y	Y	Y	N	N	Y	N	N	N	N	Y	N	Y	N	N	Y	Y	Y	N	A	N	N	2023-02-01	7	2	5
67	F	breast	self	Self	Y	N		N	N	N	N	Y	N	Y	Y	N	Y	N	N	N	Y	Y	N	active	active	N	Y	Y	Y	N	A	N	N	2023-03-01	1	0	1
68	F	AML	Hematology	hematology	N	N		N	N	N	N	Y	N	Y	N	N	Y	N	N	N	N	Y	N	Y	N	N	Y	Y	Y	Y	A	Y	Y	2022-12-01	7	6	1
68	F	breast	oncology	oncology	Y	N		N	N	N	N	Y	N	Y	N	N	Y	N	N	N	N	Y	N	active	active	N	Y	Y	Y	N	A	N	N	2023-03-01	4	1	3
68	F	breast	self	Self	N	N		N	N	N	N	Y	N	Y	Y	N	Y	N	N	N	N	Y	N	Y	N	N	Y	Y	Y	N	A	Y	N	2022-08-01	2	1	1
68	F	ovarian	primary care	primary care	N	N		N	N	N	N	Y	N	Y	N	N	Y	N	N	N	N	Y	N	Y	N	N	Y	Y	Y	N	A	Y	N	2022-02-01	4	2	2
69	F	Breast	Primary care	primary care	N	N		N	N	N	N	Y	N	Y	N	N	Y	N	N	N	Y	Y	N	Y	N	N	Y	Y	Y	N	A	Y	N	2022-04-12	3	1	2
69	F	Myeloid sarcoma	Hematology	hematology	N	N		N	N	N	N	Y	N	Y	Y	N	Y	N	N	N	Y	Y	N	Y	N	N	Y	Y	Y	Y	A	N	N	2022-08-29	3	3	0
70	F	Breast	Medical oncology	oncology	N	N		N	N	N	N	N	N	Y	Y	N	Y	N	Y	N	N	Y	N	Y	N	N	Y	Y	Y	N	A	N	Y	2022-03-15	3	0	3
70	F	Lung	Self	Self	Y	N		N	N	N	N	Y	N	Y	N	N	Y	N	N	N	N	Y	N	Y	active	N	Y	Y	Y	N	A	Y	Y	2022-02-01	4	3	1
71	F	CLL	lymphoma clinic	oncology	Y	Y	TP53	N	N	N	N	Y	N	Y	N	N	Y	N	N	N	N	Y	N	Y	active	N	Y	Y	Y	N	alive	N	N	2021-12-01	5	0	5
71	F	head/neck SCC	surgical oncology	oncology	N	N		N	N	N	N	Y	N	Y	N	N	Y	N	Y	Y	N	Y	N	Y	N	N	Y	Y	Y	N	A	Y	Y	2021-12-01	4	2	2
72	F	breast	genetics	Genetics	N	Y	TP53	N	N	N	N	Y	N	Y	N	N	Y	N	N	N	N	Y	N	Y	N	N	Y	Y	Y	N	A	Y	Y	2021-12-01	3	3	0
72	F	breast	oncology	oncology	Y	N		N	N	N	N	Y	N	Y	Y	N	Y	N	N	N	N	Y	N	Y	N	N	Y	Y	Y	N	A	N	Y	2022-08-01	13	5	8
73	F	breast	oncology	oncology	N	N		N	N	N	N	Y	N	Y	N	N	N	N	N	N	N	Y	N	Y	N	N	Y	Y	Y	N	A	Y	N	2023-01-01	1	0	1
74	F	Breast, melanoma	Medical oncology	oncology	N	Y	BRCA	N	N	N	N	Y	N	Y	N	N	N	N	N	N	N	Y	N	Y	N	N	Y	Y	N	N	A	N	N	2022-09-02	3	0	3
74	F	Lung	oncology	oncology	Y	N		N	N	N	N	Y	N	Y	Y	Y	N	N	N	N	N	Y	N	Y	active	N	Y	Y	Y	N	A	Y	Y	2022-05-01	3	2	1
75	F	AML, multiple myeloma, breast cancer	BMT	BMT	N	N		N	N	N	N	Y	N	Y	N	N	Y	N	Y	N	N	Y	N	Y	N	N	Y	Y	Y	Y	A	Y	N	2022-06-01	3	1	2
75	F	breast	oncology	oncology	N	N		N	N	N	N	Y	Y	Y	Y	N	Y	N	N	N	N	Y	N	Y	N	N	Y	Y	Y	N	A	N	Y	2023-03-01	6	2	4
75	F	breast	self	Self	N	Y	RAD50	N	N	N	Y	Y	Y	Y	Y	N	Y	N	Y	Y	N	Y	N	Y	N	N	Y	Y	Y	N	A	Y	Y	2022-01-01	10	2	8
75	F	Lung	Medical oncology	oncology	N	N		N	N	N	N	Y	Y	Y	N	N	N	N	N	N	N	Y	N	Y	N	N	Y	Y	Y	N	A	Y	Y	2022-02-17	9	8	1
76	F	breast	Medical oncology	oncology	Y	N		N	N	N	N	Y	N	Y	N	N	Y	Y	Y	Y	Y	N	N	Y	active	N	Y	Y	Y	N	A	Y	Y	2021-12-13	5	2	3
76	F	breast	Self	Self	N	N		N	N	N	N	Y	N	Y	N	N	Y	N	N	N	N	Y	N	Y	N	N	Y	Y	N	N	A	Y	N	2022-02-01	4	1	3
76	F	breast, endometrial	oncology	oncology	N	N		N	N	N	N	Y	N	Y	N	N	N	N	Y	N	N	Y	N	Y	N	N	Y	Y	Y	N	A	N	N	2022-05-01	3	1	2
76	F	CLL, thyroid	Hematology	hematology	Y	N		N	N	N	N	Y	N	Y	N	N	Y	N	N	N	N	Y	N	Y	active	N	Y	Y	Y	Y	A	Y	Y	2021-11-01	8	6	2
77	F	Breast	Primary care	primary care	N	N		N	N	N	N	Y	N	Y	N	Y	Y	N	N	N	N	Y	N	Y	N	N	Y	Y	N	N	A	N	N	2022-01-13	3	2	1
77	F	Multiple myeloma	Hematology	hematology	Y	N		N	N	N	N	Y	N	Y	N	N	N	N	Y	N	N	Y	N	Y	active	N	Y	Y	Y	Y	A	N	N	2022-08-01	3	1	2
77	F	Ovarian	Gyn-onc	Oncology	N	N		N	N	N	Y	Y	N	Y	N	N	Y	N	N	N	N	Y	N	Y	N	N	Y	Y	N	N	A	Y	Y	2022-01-21	1	0	1
78	F	lung	oncology	oncology	Y	N		N	N	N	N	N	N	N	N	N	Y	N	N	N	N	N	N	active	active	Y	N	N	Y	N	A	Y	Y	2022-01-01	6	2	4
79	F	Breast, ovarian, multiple myeloma	Hematology	hematology	Y	N		N	N	N	N	N	N	Y	N	Y	Y	N	N	N	Y	Y	N	Y	active	Y	Y	Y	Y	N	A	Y	Y	2021-12-09	3	2	1	*Chen now listed as PCP
79	F	esophageal neuroendocrine, melanoma	self	Self	Y	N		N	N	N	N	Y	N	Y	N	N	Y	Y	Y	N	N	Y	N	Active	active	Y	Y	Y	N	N	D	Y	Y	2022-06-10	2	1	1
79	F	lung	oncology	oncology	Y	N		N	N	N	N	Y	N	Y	Y	Y	Y	N	N	N	N	Y	N	active	active	Y	Y	Y	Y	N	D	Y	Y	2022-08-01	2	0	2
81	F	Breast, colon	Medical oncology	oncology	N	N		N	N	N	N	Y	N	Y	Y	N	Y	N	Y	N	N	Y	N	Y	N	N	Y	Y	Y	N	A	N	Y	2021-11-23	10	5	5
84	F	DLBCL	Medical oncology	oncology	N	N		N	N	N	N	Y	N	Y	N	N	Y	N	N	N	N	NA	N	N	N	N	Y	Y	Y	N	A	N	N	2022-03-01	5	1	4
86	F	Breast	Medical oncology	oncology	N	N		N	N	N	N	Y	N	Y	N	Y	N	N	N	N	N	Y	N	Y	N	N	Y	Y	N	N	A	N	N	2022-05-13	3	0	3
87	F	MGUS	hematology	hematology	Y	N		N	N	N	N	Y	N	Y	Y	N	N	N	N	N	N	N	N	Y	N	Y	Y	Y	N	N	A	Y	Y	2022-08-01	3	2	1
87	F	Ovarian, neuroendocrine	Self	Self	N	N		N	N	N	N	N	N	Y	Y	N	N	N	N	N	N	NA	N	Y	N	N	Y	Y	Y	N	A	N	Y	2022-02-01	7	4	3
90	F	breast	self	Self	N	N		N	N	N	N	Y	N	Y	N	N	Y	N	N	N	N	Y	N	Y	N	N	Y	Y	Y	N	A	N	N	2022-08-01	8	5	3
19	M	aplastic anemia	HAT	HAT	N	N		Y	N	N	Y	Y	N	Y	N	N	N	N	N	N	N	N	N	Y	N	N	Y	Y	Y	Y	A	N	N	2022-09-01	2	1	1
22	M	ALL	Endocrinology		N	N		Y	N	N	N	Y	N	Y	N	N	Y	N	Y	Y	Y	N	N	N	N	N	Y	Y	Y	Y	A	Y	Y	2022-12-01	3	1	2
24	M	ependymoma	Medical oncology	oncology	N	N		Y	Y	N	Y	N	N	Y	N	N	Y	N	N	N	N	N	N	Y	N	N	Y	Y	Y	N	A	N	N	2022-12-01	1	0	1
24	M	PMBCL	HAT	HAT	N	N		Y	Y	Y	N	Y	N	Y	N	N	Y	N	N	N	N	N	N	N	N	N	Y	Y	N	N	A	Y	Y	2021-12-01	2	2	0	This pt saw Pam S. but no referral is in our system. I labeled them as HAT for referral but want to double check
25	M	ALL	hematology	hematology	Y	N		Y	Y	N	N	Y	Y	Y	N	N	Y	N	Y	Y	Y	Y	N	Y	N	N	Y	Y	Y	N	A	N	N	2022-11-18	1	0	1
25	M	Diamond blackfan Anemia	Pam simon	oncology	N	N		Y	N	N	N	Y	N	Y	N	N	Y	N	N	N	N	N	N	Y	N	N	Y	Y	Y	Y	alive	Y	Y	2023-02-01	2	0	2
27	M	ALL	HAT	HAT	N	N		Y	Y	N	N	Y	Y	Y	N	N	Y	N	N	N	Y	Y	N	Y	N	N	Y	Y	Y	Y	A	Y	Y	2021-11-18	2	0	2
27	M	NHL	self	Self	N	N		Y	N	N	N	Y	N	Y	N	N	Y	N	N	N	N	Y	N	N	N	N	Y	Y	Y	Y	A	N	N	2022-07-01	2	0	2
28	M	testicular	self	Self	N	N		Y	Y	N	N	N	N	Y	N	N	Y	N	N	N	N	Y	N	Y	N	N	Y	Y	Y	N	A	N	N	2022-10-28	1	0	1
31	M	Diamond blackfan Anemia	BMT	BMT	N	N		Y	Y	Y	N	Y	Y	N	N	N	Y	Y	Y	N	N	N	N	Y	N	N	Y	Y	Y	Y	A	Y	N	2021-12-01	2	1	1
31	M	retinoblastoma	genetics	Genetics	N	Y	RB1	Y	Y	N	N	N	N	N	Y	N	Y	N	N	N	N	Y	N	Y	N	N	Y	Y	Y	N	A	N	N	2022-09-16	1	0	1
32	M	AML	cancer genetics		N	N		Y	N	N	N	Y	N	Y	Y	N	Y	N	Y	N	Y	Y	N	Y	N	N	Y	Y	N	N	Alive	Y	Y	2023-02-01	1	0	1
32	M	pituicytoma	self	Self	N	N		Y	N	N	N	N	N	Y	N	N	N	N	Y	N	N	Y	N	N	N	N	Y	Y	Y	N	A	Y	Y	2023-02-01	6	3	3
33	M	AML	hematology	hematology	N	N		Y	N	N	N	Y	N	Y	N	N	Y	Y	Y	N	N	Y	N	Y	N	N	Y	Y	Y	Y	A	Y	Y	2021-12-01	3	1	2
34	M	ALL	Self	Self	N	N		Y	N	N	N	Y	N	Y	N	N	Y	Y	Y	N	Y	Y	N	Y	N	N	Y	Y	Y	Y	A	Y	Y	2016-07-01	16	4	12		Established care with IY during res - how do we want to deal with timeline
34	M	RCC	self	Self	Y	N		Y	N	N	N	N	N	Y	N	N	Y	N	N	N	N	N	N	active	active	Y	Y	Y	Y	N	D	N	N	2021-12-01	9	8	1
35	M	Osteosarcoma	Self	Self	N	N		Y	N	N	N	Y	N	Y	N	N	Y	Y	Y	N	N	Y	N	Y	N	N	Y	Y	Y	N	A	Y	Y	2021-11-01	8	6	2
35	M	testicular	oncology	oncology	N	N		Y	Y	N	Y	N	N	Y	N	N	Y	N	N	N	N	Y	N	Y	N	N	Y	Y	Y	N	A	Y	Y	2023-01-27	2	1	1
36	M	Hodgkin lymphoma	oncology	oncology	N	N		Y	Y	N	N	N	N	Y	N	N	Y	Y	N	N	N	Y	N	Y	N	N	Y	Y	Y	N	A	Y	N	2022-06-17	1	0	1
36	M	Hodgkins	lymphoma clinic	oncology	N	N		Y	Y	Y	N	N	N	Y	N	N	Y	N	N	N	N	Y	N	N	N	N	Y	Y	Y	N	alive	Y	Y	2023-02-01	1	0	1
37	M	ependymoma	Self	Self	N	N		Y	N	N	N	N	N	Y	N	N	N	N	N	N	N	N	N	Y	N	N	Y	Y	Y	N	A	Y	N	2022-01-01	2	0	2
40	M	multiple myeloma	hematology	hematology	Y	N		Y	N	N	N	N	N	Y	N	N	Y	N	N	N	N	Y	N	Y	N	N	Y	Y	Y	N	A	Y	N	2022-05-06	1	0	1
41	M	ALL	Pam Simon	oncology	N	N		N	Y	Y	N	Y	N	Y	N	N	Y	N	N	N	N	N	N	N	N	N	Y	Y	N	N	alive	Y	Y	2023-03-01	1	0	1
42	M	AML, lymphoma	hematology	hematology	N	N		N	N	N	N	N	N	Y	N	N	Y	N	N	N	N	Y	N	Y	N	N	Y	Y	Y	Y	A	N	N	2022-01-01	3	2	1
45	M	Breast	Medical oncology	oncology	N	Y	BRCA1	N	N	N	N	N	N	N	N	N	Y	N	N	N	N	Y	N	Y	N	N	Y	N	N	N	A	Y	Y	2021-11-01	1	0	1
45	M	Oligodendroglioma	Neurooncology	oncology	N	N		N	N	N	N	N	N	Y	N	N	Y	N	Y	N	Y	Y	N	Y	N	N	Y	Y	Y	N	A	Y	Y	2021-10-01	3	2	1
45	M	Squamous cell tongue	Medical oncology	oncology	Y	Y	POT1	N	N	N	N	N	N	Y	N	N	Y	N	N	N	N	Y	N	Y	N	N	Y	Y	Y	N	A	Y	Y	2023-03-01	3	2	1
49	M	AML	hematology	hematology	N	N		N	Y	N	N	Y	N	Y	N	N	Y	N	N	N	N	Y	N	Y	N	N	Y	Y	Y	N	A	Y	N	2021-11-22	2	1	1
50	M	CML	BMT	BMT	N	N		N	N	N	N	Y	N	Y	Y	N	Y	N	N	N	N	Y	N	Y	N	N	Y	Y	Y	Y	A	Y	Y	2022-10-01	3	2	1
51	M	Rectal adenocarcinoma	Self	Self	N	N		N	N	N	Y	Y	N	Y	N	N	Y	N	N	N	N	Y	N	Y	N	N	Y	Y	Y	N	A	Y	Y	2021-11-22	4	0	4
53	M	Hodgkin	self	Self	N	N		N	N	N	N	Y	N	Y	Y	Y	Y	N	N	N	N	Y	N	Y	N	N	Y	Y	Y	Y	A	N	N	2022-02-01	5	1	4
57	M	AML	Medical oncology	oncology	Y	N		N	N	N	N	Y	N	Y	Y	N	Y	N	N	N	N	Y	N	Y	N	N	Y	Y	Y	Y	A	Y	Y	2021-12-13	8	1	7
57	M	DLBCL	oncology	oncology	N	N		N	N	N	N	N	N	Y	N	N	Y	Y	N	N	N	Y	N	Y	N	N	Y	Y	Y	N	A	Y	Y	2022-07-01	1	0	1
58	M	NET	self	Self	Y	N		N	N	N	N	N	N	Y	N	N	Y	N	N	N	N	Y	N	Y	Y	N	Y	Y	Y	N	A	Y	Y	2022-04-04	2	0	2
59	M	ET	self	Self	Y	N		N	N	N	N	N	N	Y	N	N	Y	N	Y	N	Y	Y	N	Y	N	N	Y	Y	Y	N	A	N	N	2022-02-02	3	3	0
59	M	prostate	genetics	Genetics	Y	Y	DICER1	N	N	N	N	Y	N	Y	N	N	Y	N	N	N	N	Y	N	active	active	N	Y	Y	Y	N	A	Y	N	2021-11-01	3	2	1
60	M	Neuroendocrine	GI oncology	Oncology	N	N	N	N	N	N	N	N	N	N	Y	N	N	N	N	N	N	Y	N	Y	Y	N	Y	Y	Y	N	A	N	Y	2023-03-01	4	1	3
60	M	sarcoma, MDS, adrenal cancer	genetics	Genetics	Y	Y	TP53	N	N	N	N	N	N	Y	N	N	Y	N	N	N	N	Y	Y	Y	Y	N	Y	Y	Y	Y	A	N	N	2022-01-25	1	0	1
61	M	ET, melanoma	self	Self	Y	N		N	N	N	N	N	N	Y	Y	N	N	N	N	N	N	Y	N	Y	N	N	Y	Y	Y	N	A	Y	Y	2022-10-28	1	0	1
61	M	lung	self	Self	N	N		N	N	N	N	N	N	Y	N	N	Y	N	N	N	N	Y	N	Y	N	N	Y	Y	Y	N	A	N	N	2021-04-01	1	0	1
61	M	SLL	oncology	oncology	Y	N		N	N	N	N	N	N	Y	N	N	N	N	N	N	N	Y	N	Y	N	N	Y	Y	Y	N	A	Y	Y	2022-01-11	2	0	2
62	M	Marginal zone lymphoma, DLBCL	Medical oncology	oncology	N	N		N	N	N	Y	Y	N	Y	N	N	Y	N	N	N	N	Y	N	Y	N	N	Y	Y	Y	N	A	Y	Y	2022-05-06	1	0	1
63	M	Marginal zone lymphoma	Medical oncology	oncology	Y	Y	TP53	N	N	N	N	N	N	Y	Y	N	N	N	N	N	N	Y	N	Y	active	N	Y	N	N	N	A	N	N	2022-02-01	1	0	1		No longer this pt PCP
64	M	sarcoma	self	Self	N	N		N	N	N	N	N	N	N	N	N	Y	N	N	N	N	N	N	Y	N	N	N	N	Y	N	A	N	N	2022-08-01	1	0	1
66	M	AML	BMT	BMT	N	N		N	N	N	N	N	N	Y	Y	N	Y	N	N	N	N	Y	N	Y	N	N	Y	Y	Y	Y	alive	N	N	2022-08-01	4	0	4
66	M	amyloidosis	hematology	hematology	Y	N		N	N	N	N	N	N	Y	N	Y	N	Y	N	N	N	Y	N	Y	N	N	Y	Y	Y	N	A	N	N	2022-01-01	3	1	2
66	M	Pancreas	Self	Self	N	N		N	N	N	N	N	N	Y	Y	N	Y	Y	Y	N	N	Y	N	Y	N	N	Y	Y	Y	N	A	Y	Y	2022-06-01	3	1	2
66	M	squamous cell carcinoma of leg	medical oncology	oncology	N	N		N	N	N	N	N	N	Y	Y	Y	Y	N	N	N	Y	Y	N	Y	Y	N	Y	Y	N	N	A	Y	Y	2016-11-01	4	0	4		Established care with IY during res - how do we want to deal with timeline
66	M	tongue SCC	oncology	oncology	N	N		N	N	N	N	N	N	Y	N	N	Y	N	Y	Y	N	Y	N	Y	N	N	Y	Y	Y	N	A	N	Y	2023-02-01	8	5	3
67	M	CLL	Self	Self	N	N		N	N	N	N	N	N	Y	N	N	Y	N	N	N	N	Y	N	Y	N	N	Y	Y	Y	N	A	N	Y	2022-02-01	4	3	1
67	M	Prostate	primary care	primary care	Y	N		N	N	N	Y	N	N	Y	Y	N	Y	N	N	N	N	N	N	active	active	N	Y	Y	Y	N	A	Y	Y	2022-06-03	4	0	4
69	M	Mantle cell lymphoma	Medical oncology	oncology	Y	N		N	N	N	N	N	N	Y	N	Y	N	N	N	N	N	Y	N	Y	active	N	Y	Y	Y	N	A	Y	Y	2022-10-01	3	0	3		Moved to WY, new PCP listed on file
69	M	prostate	self	Self	Y	N		N	N	N	N	N	N	Y	N	N	N	N	N	N	N	Y	N	N	active	N	Y	Y	Y	N	A	N	N	2022-07-01	2	0	2
69	M	prostate	self	Self	Y	N		N	N	N	N	N	N	Y	N	N	N	N	N	N	N	Y	N	Y	N	N	Y	Y	N	N	A	N	N	2022-02-01	3	3	0
70	M	waldenstrom macroglobulinemia	Medical oncology	oncology	Y	N		N	N	N	N	N	N	Y	N	N	N	N	N	N	N	Y	N	N	N	N	Y	Y	N	N	A	N	Y	2022-11-08	2	1	1
73	M	Glucagonoma	GI oncology		N	N		N	N	N	N	N	N	Y	Y	N	N	N	N	N	N	Y	N	Y	N	N	Y	Y	Y	N	A	Y	Y	2022-02-04	2	0	2
74	M	RCC	self	Self	N	N		N	N	N	N	N	N	Y	Y	N	Y	N	N	N	N	Y	N	Y	N	N	Y	Y	Y	N	A	Y	N	2022-11-01	1	0	1
75	M	DLBCL	oncology	oncology	N	N		N	N	N	N	N	N	Y	N	N	Y	Y	Y	Y	N	Y	N	Y	N	N	Y	Y	Y	N	A	Y	N	2022-06-01	3	1	2
76	M	Sezary, prostate	dermatology		Y	N		N	N	N	Y	N	N	Y	N	N	Y	N	N	N	N	Y	N	Y	N	Y	Y	Y	Y	N	A	Y	Y	2021-11-01	4	2	2	diagnosed by you
78	M	prostate, CLL	self	Self	Y	N		N	N	N	Y	N	N	Y	Y	N	Y	N	N	N	N	Y	N	Y	Y	N	Y	Y	Y	N	A	N	Y	2022-02-01	4	2	2
88	M	CLL	primary care	primary care	Y	N		N	N	N	N	N	N	Y	N	Y	N	Y	N	N	N	N	N	active	active	N	Y	Y	Y	N	D	N	Y	2022-08-26	4	0	4
